# Supplementary material for: X-ray absorption spectroscopy of Ba- and Cs-promoted Ru/mesoporous carbon catalysts for long-term ammonia synthesis under intermittent operation conditions
Source: Royal Society of Chemistry journal article supplement (doi:10.1039/c9se00781d), 2019-11-14
Supplement: c9se00781d1.pdf [file c9se00781d1.pdf]

## Electronic Supplementary Information

### **X-ray absorption spectroscopy of Ba- and Cs-promoted Ru/Mesoporous carbon catalysts for long-term ammonia synthesis under intermittently varied conditions**

Masayasu Nishi\*, Shih-Yuan Chen, Hideyuki Takagi

Energy Catalyst Technology Group, Research Institute of Energy Frontier (RIEF),  
Department of Energy and Environment, National Institute of Advanced Industrial  
Science and Technology (AIST), 16-1 Onogawa, Tsukuba, Ibaraki 305-8589, Japan

#### Table of Contents

|                                                                                                                                                                                                                                                                                                                                                                                |   |
|--------------------------------------------------------------------------------------------------------------------------------------------------------------------------------------------------------------------------------------------------------------------------------------------------------------------------------------------------------------------------------|---|
| <b>Table S1</b> – The proportion of the Ru metal and RuO <sub>2</sub> obtained by fitting of Ru <i>K</i> -edge XANES spectra for prepared 0.5Ba-10Ru/AC, 0.5Ba-10Ru/MPC, 2.5Cs-10Ru/AC, and 2.5Cs-10Ru/MPC catalysts.....                                                                                                                                                      | 3 |
| <b>Fig. S1</b> – Temperature dependence of ammonia synthesis rate and yield over (A) 10Ru/MPC and (B) 10Ru/AC catalysts at 0.99 MPa, H <sub>2</sub> /N <sub>2</sub> = 3, GHSV = 9,000 h <sup>-1</sup> .....                                                                                                                                                                    | 4 |
| <b>Fig. S2</b> – Arrhenius plots for ammonia synthesis over 10Ru/AC and 10Ru/MPC catalysts under mild conditions using a H <sub>2</sub> pressure of 0.99 MPa and a GHSV value of 9,000 h <sup>-1</sup> using a mixed gas of H <sub>2</sub> and N <sub>2</sub> with a H <sub>2</sub> /N <sub>2</sub> ratio of 3.....                                                            | 5 |
| <b>Fig. S3</b> – Ru particle size distributions of prepared Ba-Ru and Cs-Ru catalysts. (a) 0.5Ba-10Ru/MPC, (b) 0.1Ba-10Ru/MPC, (c) 0.5Ba-10Ru/AC, (d) 2.5Cs-10Ru/MPC, (e) 0.5Cs-10Ru/MPC, (f) 0.1Cs-10Ru/MPC, and (g) 2.5Cs-10Ru/AC.....                                                                                                                                       | 6 |
| <b>Fig. S4</b> – Nitrogen adsorption-desorption isotherms of (A) yBa-10Ru/AC and yBa-10Ru/MPC catalysts and (B) xCs-10Ru/AC and xCs-10Ru/MPC catalysts.....                                                                                                                                                                                                                    | 7 |
| <b>Fig. S5</b> – Ru <i>K</i> -edge XANES spectra for prepared (a) 0.5Ba-10Ru/AC, (b) 0.5Ba-10Ru/MPC, (c) 2.5Cs-10Ru/AC, (d) 2.5Cs-10Ru/MPC catalysts and standards—(e) RuO <sub>2</sub> and (f) metallic Ru. The solid lines are the experiment data, whereas the empty circles are the fitting results of linear combination in both of RuO <sub>2</sub> and metallic Ru..... | 8 |

**Fig. S6** – Wide-angle XRD patterns of used (a) 0.5Ba-10Ru/MPC and (b) 0.5Ba-10Ru/AC catalysts. The “asterisk” peaks arise from the graphite structure.....9

**Table S1** – Analysis of Ru *K*-edge XANES spectra of prepared 0.5Ba-10Ru/AC, 0.5Ba-10Ru/MPC, 2.5Cs-10Ru/AC, and 2.5Cs-10Ru/MPC catalysts.

|                | RuO <sub>2</sub> (%) | Ru (%) |
|----------------|----------------------|--------|
| 0.5Ba-10Ru/MPC | 75.8                 | 24.2   |
| 0.5Ba-10Ru/AC  | 84.1                 | 15.9   |
| 2.5Cs-10Ru/MPC | 68.0                 | 32.0   |
| 2.5Cs-10Ru/AC  | 86.6                 | 13.4   |

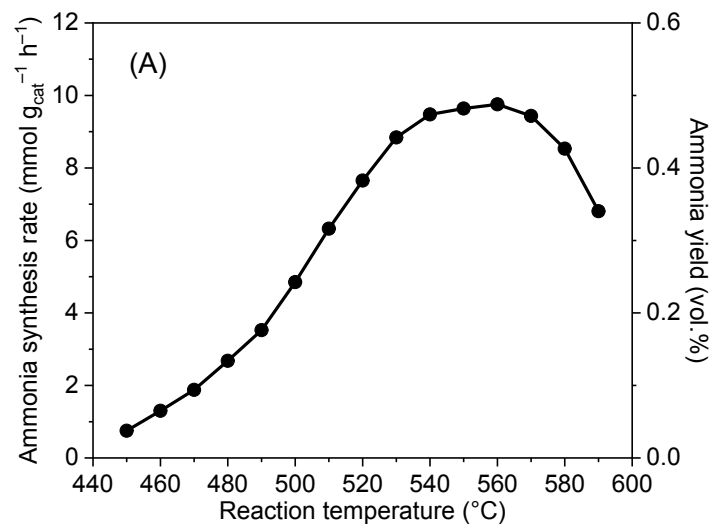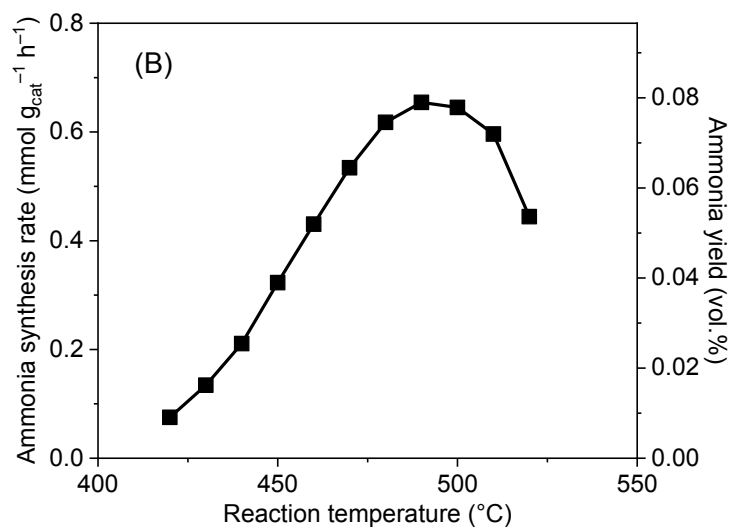

**Fig. S1** – Temperature dependence of ammonia synthesis rate and yield over (A) 10Ru/MPC and (B) 10Ru/AC catalysts at 0.99 MPa, H<sub>2</sub>/N<sub>2</sub> = 3, GHSV = 9,000 h<sup>-1</sup>.

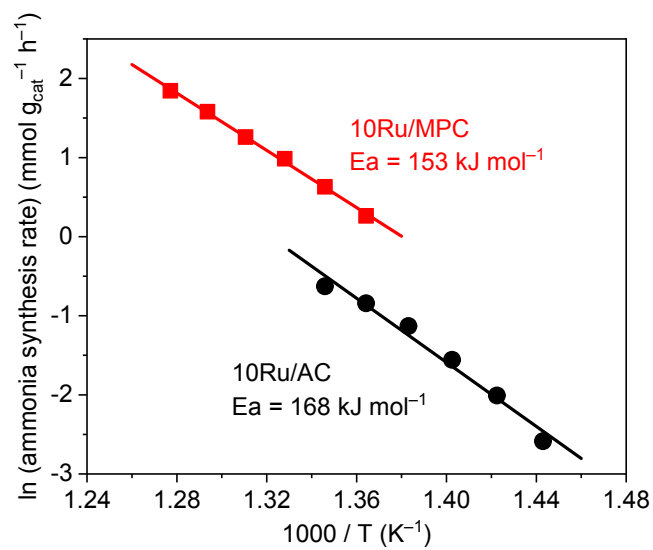

**Fig. S2** – Arrhenius plots for ammonia synthesis over 10Ru/AC and 10Ru/MPC catalysts under mild conditions using a H<sub>2</sub> pressure of 0.99 MPa and a GHSV value of 9,000 h<sup>-1</sup> using a mixed gas of H<sub>2</sub> and N<sub>2</sub> with a H<sub>2</sub>/N<sub>2</sub> ratio of 3.

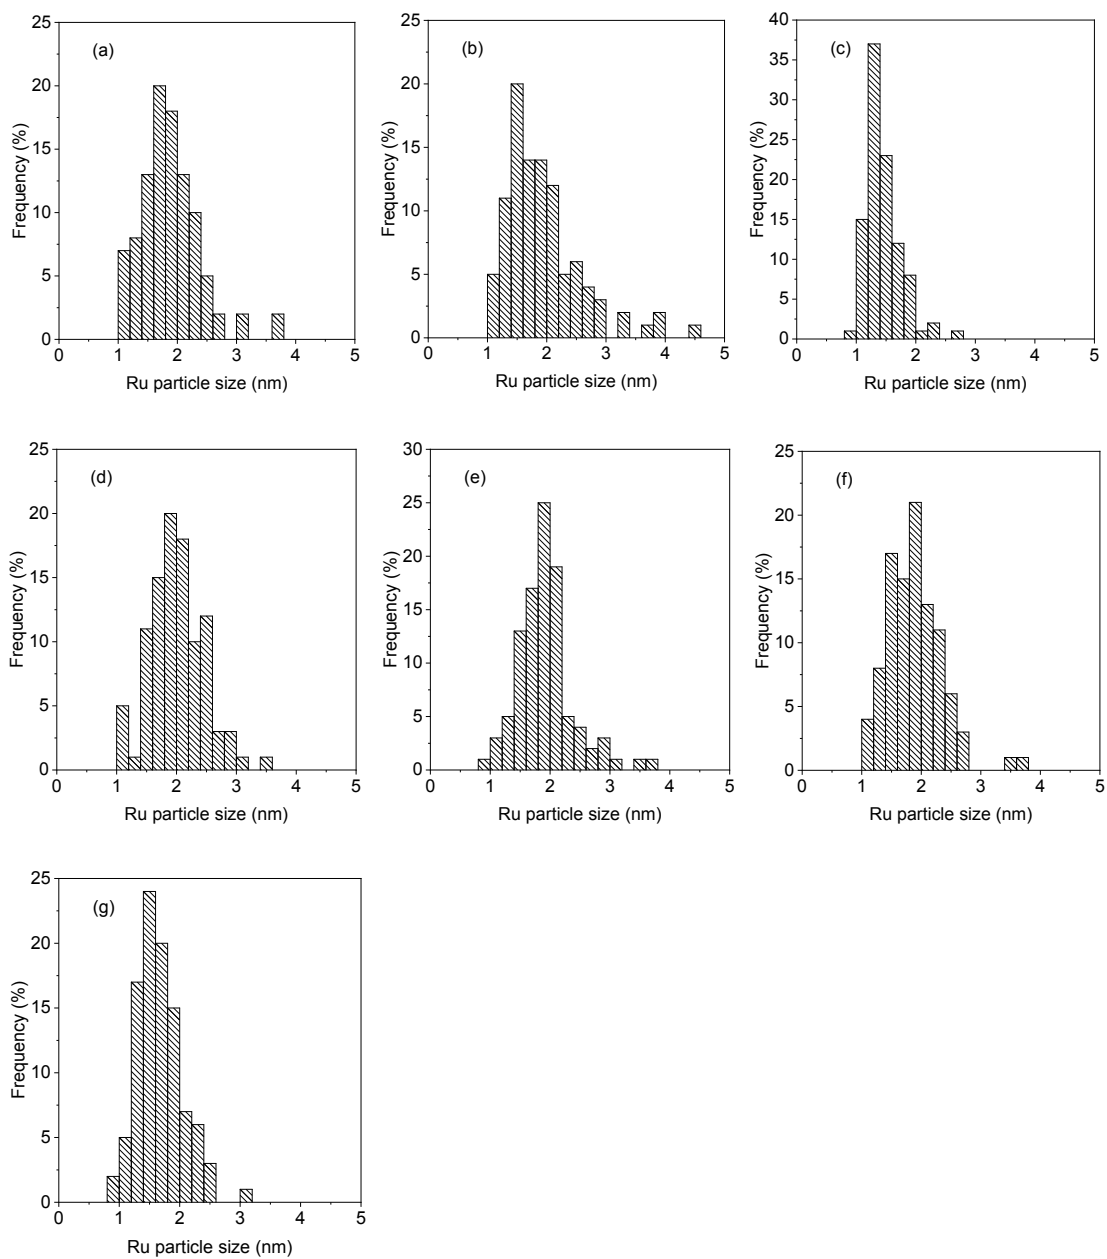

**Fig. S3** – Ru particle size distributions of prepared Ba-Ru and Cs-Ru catalysts. (a) 0.5Ba-10Ru/MPC, (b) 0.1Ba-10Ru/MPC, (c) 0.5Ba-10Ru/AC, (d) 2.5Cs-10Ru/MPC, (e) 0.5Cs-10Ru/MPC, (f) 0.1Cs-10Ru/MPC, and (g) 2.5Cs-10Ru/AC.

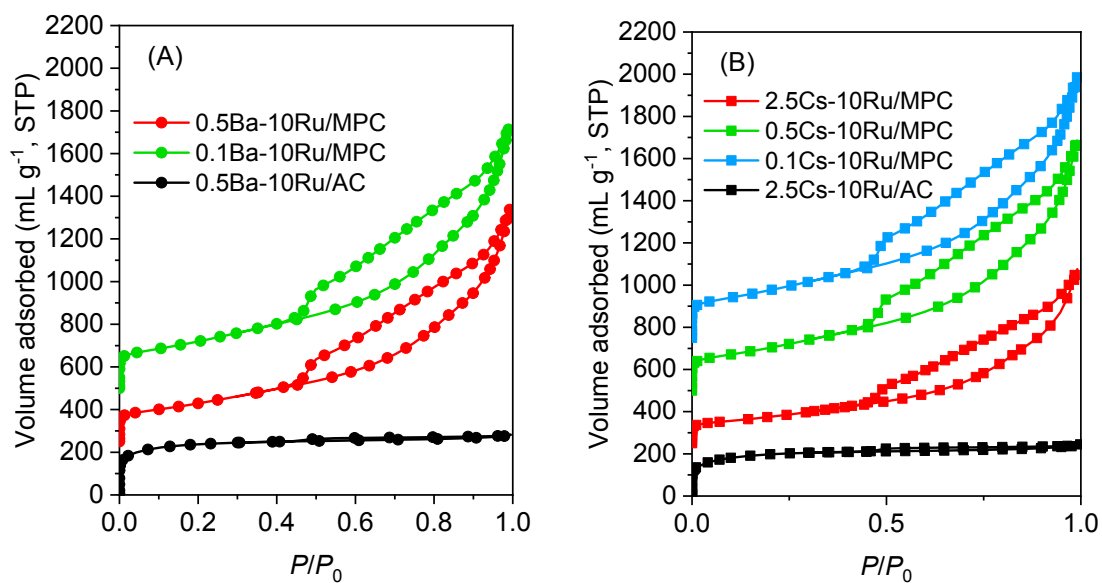

**Fig. S4** – Nitrogen adsorption-desorption isotherms of (A)  $\gamma$ Ba-10Ru/AC and  $\gamma$ Ba-10Ru/MPC catalysts and (B)  $\chi$ Cs-10Ru/AC and  $\chi$ Cs-10Ru/MPC catalysts.

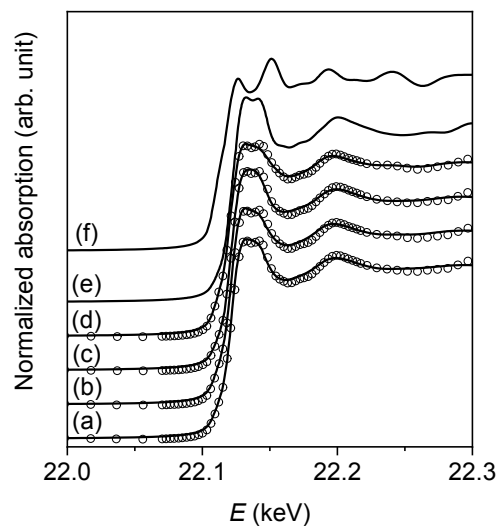

**Fig. S5** – Ru *K*-edge XANES spectra for prepared (a) 0.5Ba-10Ru/AC, (b) 0.5Ba-10Ru/MPC, (c) 2.5Cs-10Ru/AC, (d) 2.5Cs-10Ru/MPC catalysts and standards—(e) RuO<sub>2</sub> and (f) metallic Ru. The experiment data are represented as the solid curves and the fitting data of the linear combination of RuO<sub>2</sub> and metallic Ru components are presented as the empty circles.



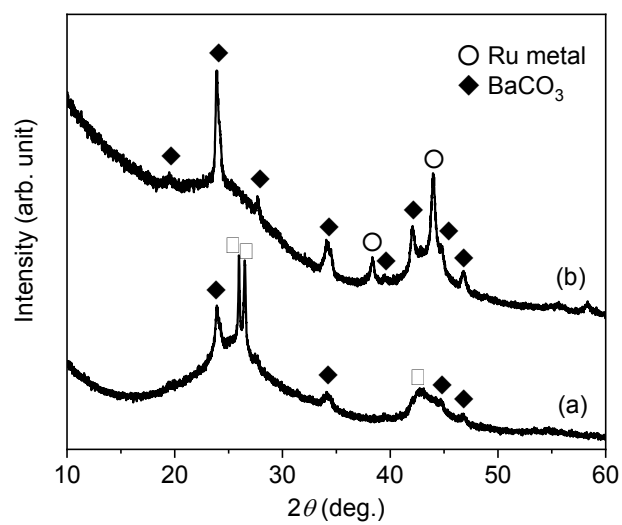

**Fig. S6** – Wide-angle XRD patterns of used (a) 0.5Ba-10Ru/MPC and (b) 0.5Ba-10Ru/AC catalysts. The “asterisk” peaks arise from the graphite structure.
